# Supplementary material
Source: PubMed Central journal article supplement (PMC4934057)

**Figure S1**

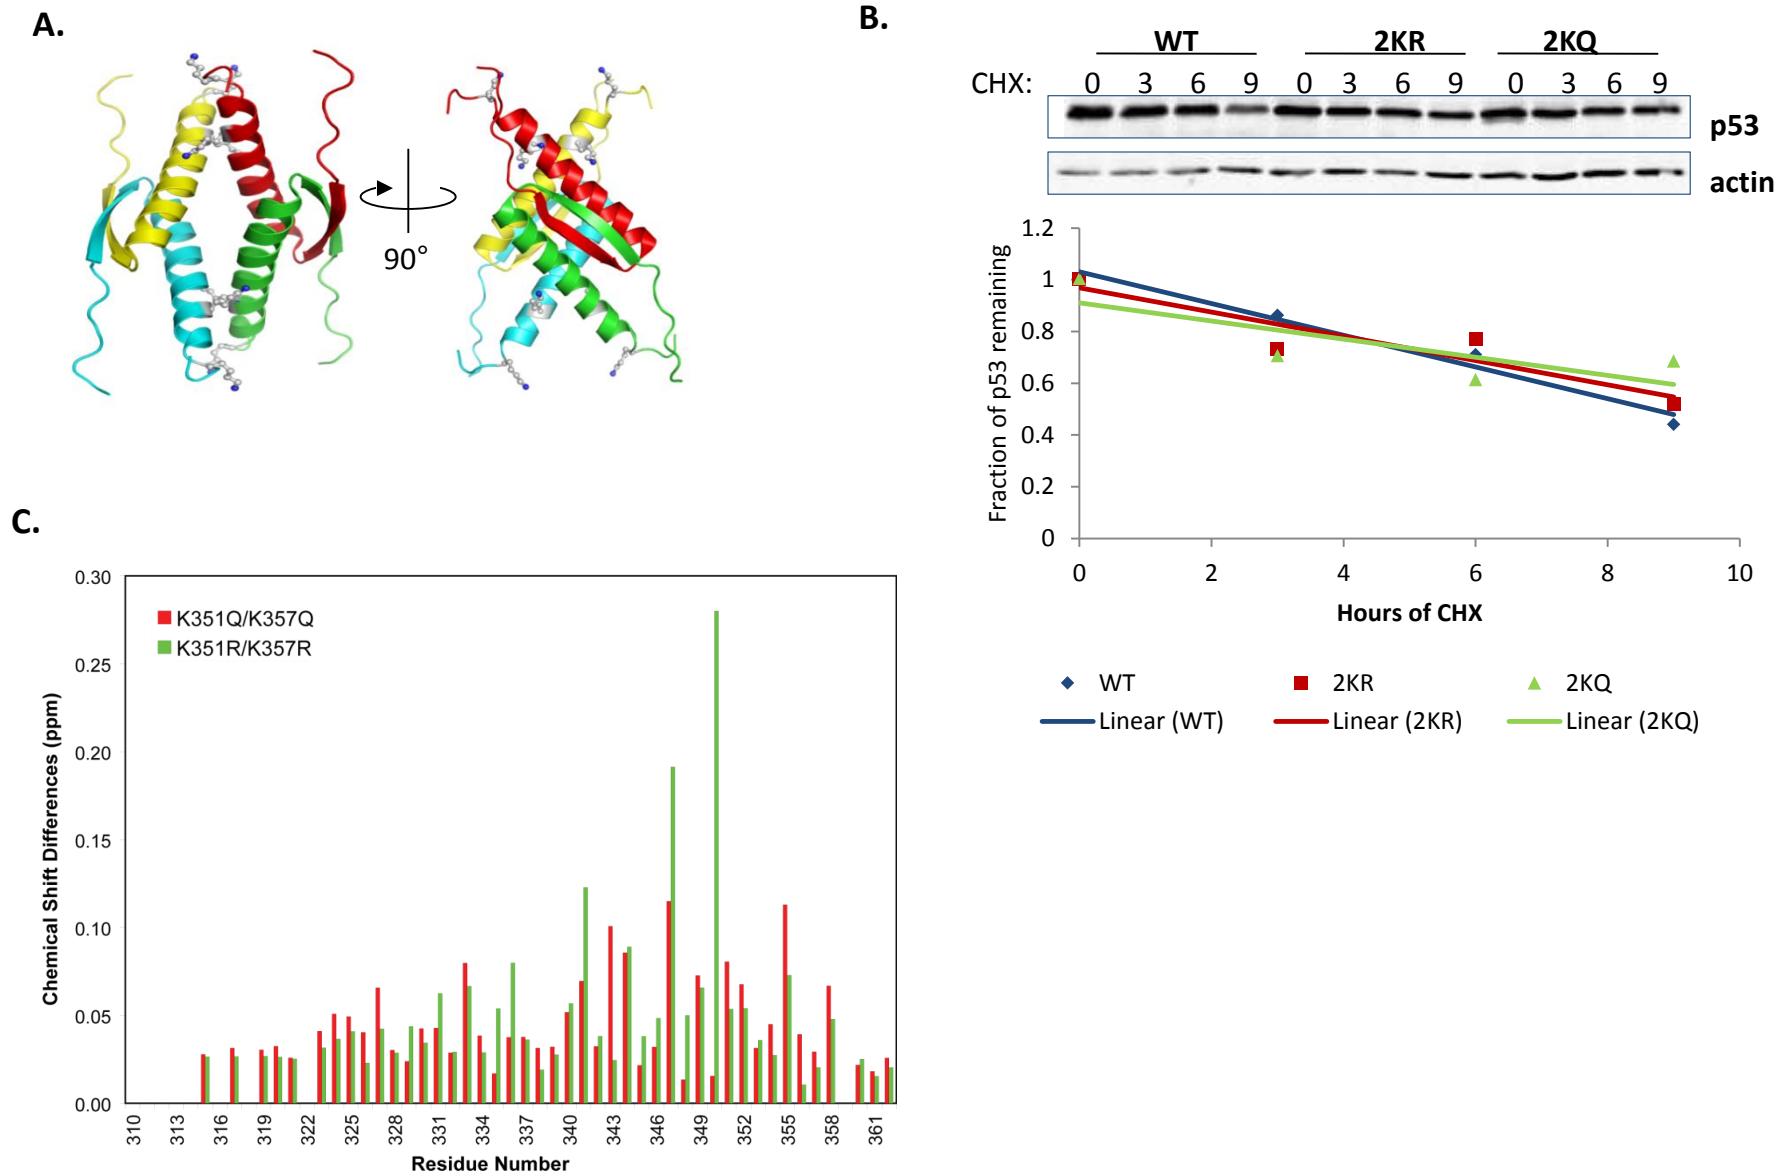

Figure S2

A.

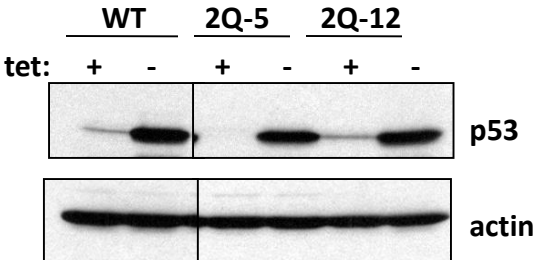

B.

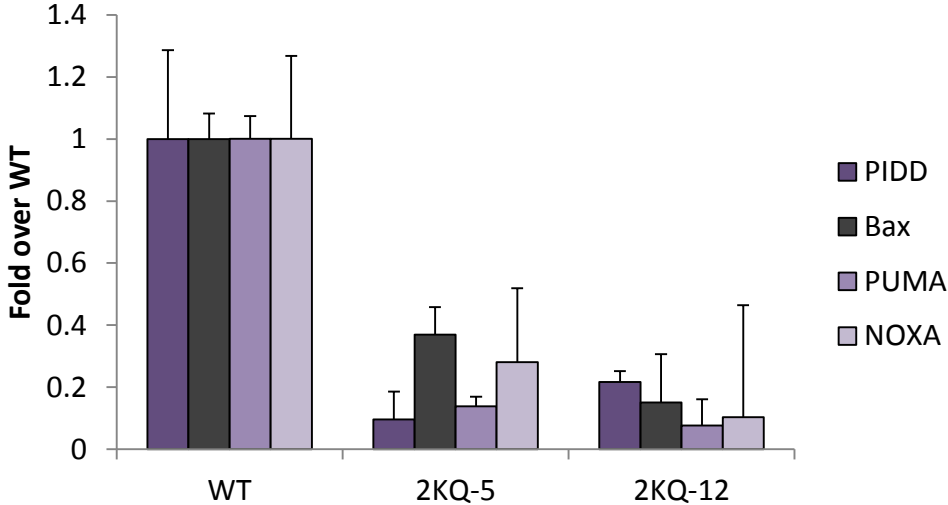

**Figure S3**

**A.**

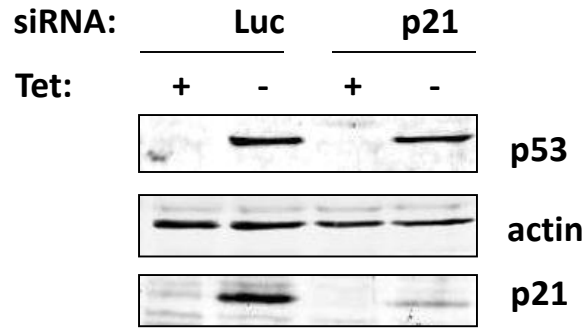

**B.**

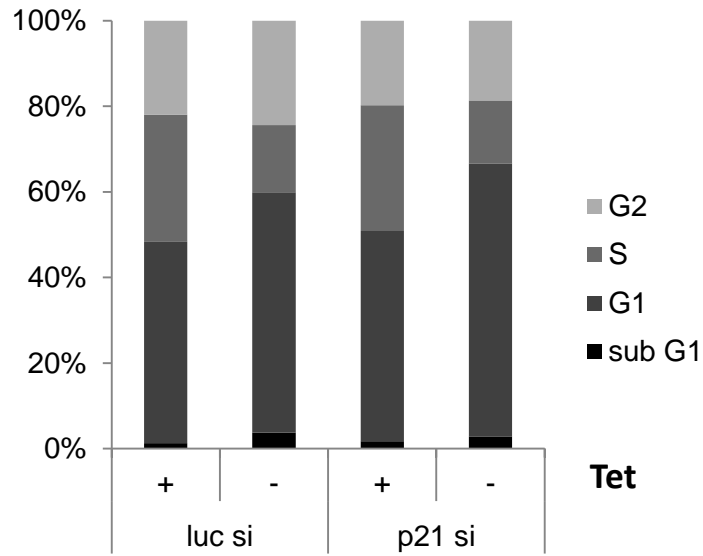

**C.**

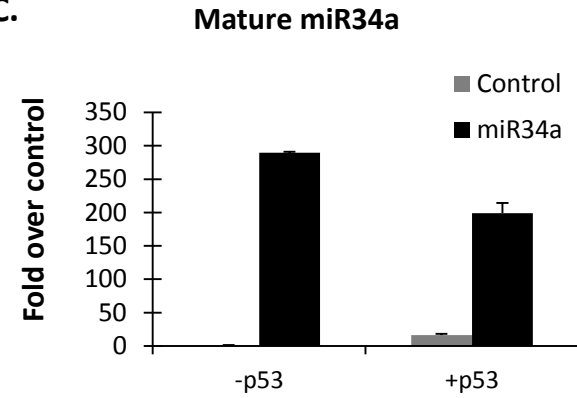

**D.**

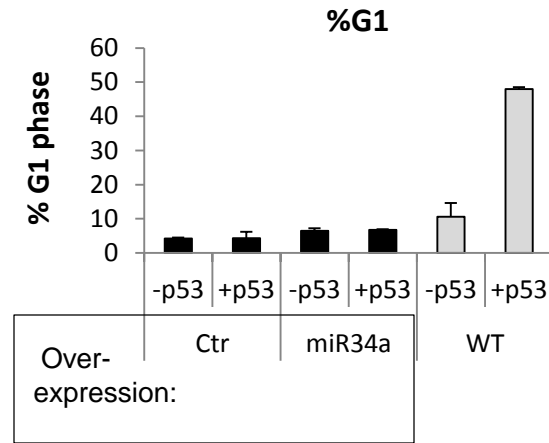

Figure S4

A.

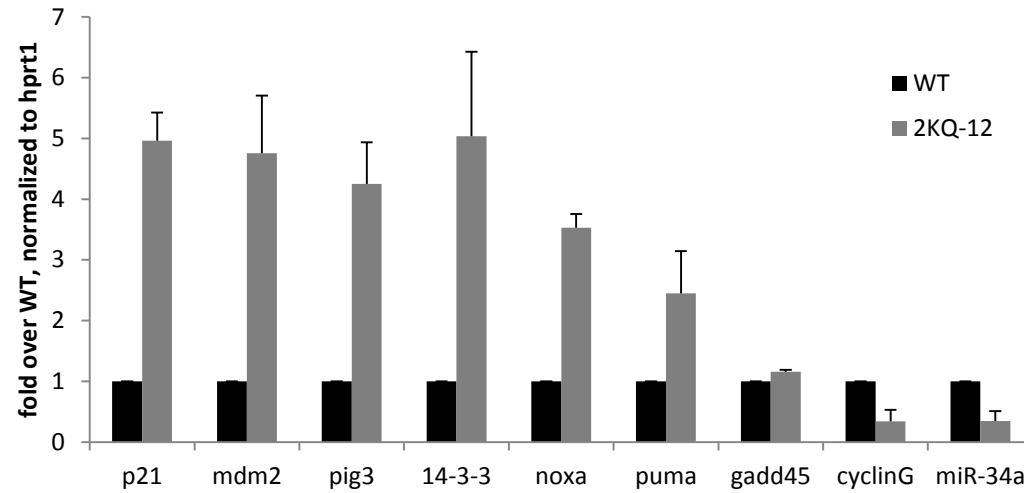

B.

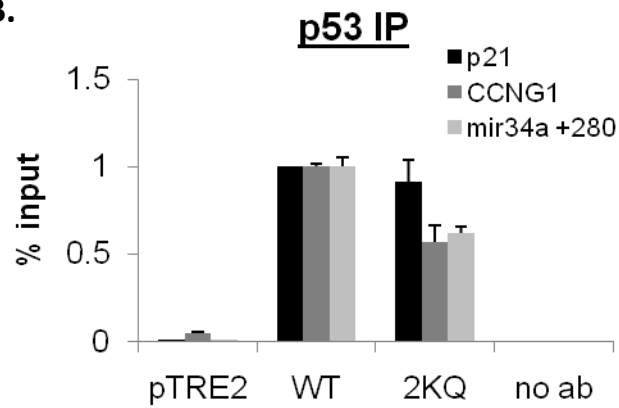

C.

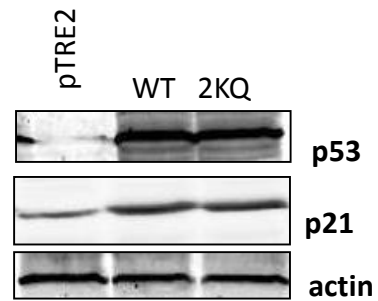

**Figure S5**

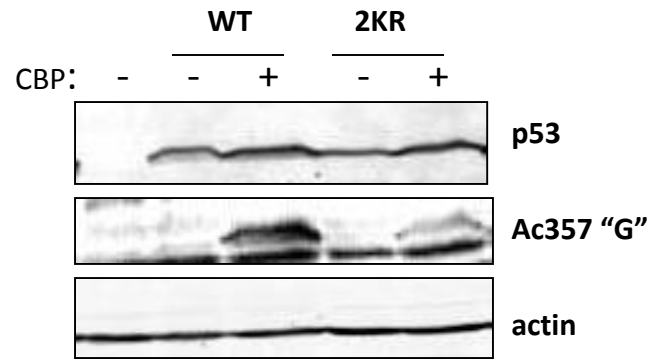

Supplement: kccy-15-11-1170270-s001.pdf [file kccy-15-11-1170270-s001.pdf]
